# Supplementary material
Source: publisher figshare collection journal article supplement (https://gsajournals.figshare.com/ndownloader/files/14890895)
Supplement: Supplementary file 1 [file 14890895]

## Sheet: Sheet1
Table S1 The primers used for qRT-PCR and qChIP.
Genes	Forward Primer (5’- 3’)	Reverse primer (5’- 3’)
Elovl6	TTCCTCCTACGGTGGATGCG	GTCGCTACGTGTTCTCTGCG
Elovl5	CAGCTTGCTTCTGTTCCCGC	CATTTTAAAACCTCTCTGCCTGAGC
Acly	GCCCCAAGATTCAGTCCCAAG	TGGCCTTGGTATGTCGGCTG
Acacb	TTCCCCAGCCAGCAGATAGC	ATCTCTGGACCAGCTGCACG
ChREBP-α	CGACACTCACCCACCTCTTC	TTGTTCAGCCGGATCTTGTC
ChREBP-β	TCTGCAGATCGCGTGGAG	CTTGTCCCGGCATAGCAAC
Pfkl	TCATCATCGCAGAGGGTGCC	CTGAACCACCAGATCCTTCACG
Tbxas1	TCCCATTGGCCCGGATTCTG	TCTCCGCCTCTCTTCTGCTG
Tecr	TCGGGATGCAAAGACGAGGG	TACCACTGCGGGTGTGTCTTG
Igfbp2	CCTGAAGGCGCTTGTCACAG	GTCATCACTGTCTGCAACCTGC
Cpt1b	CCAGCTGGCTGGTTGTTGTC	AGTGGCCATACCTTTCCGGG
Hadha	CTGCTCAAGATGGTGGCGTC	ATGCAGCCTCTGGAGCGTAG
Ppara	ATCTCACCGGGAGGCGTTTC	ACAGAGCGCTAAGCTGTGATG
Acca2	GTGGAAAGCTGCTAACGAGGC	GTGCTCGTCCACTTGCATGG
Cpt2	TCGGCCCTTAAGTGCTGTCTC	AGTTTAGGGATAGGCAGCCTGG
Ppp2rb5	TCGAGCCCTCCCAGTTTGTG	CGCTCTGCAACCTGGAAATGG
Acadvl	CCTCATTGCCAAGGCGGTTG	GCCATCCGAGCCAGCTTTTC
36B4	GCTCCAAGCAGATGCAGCA	CCGGATGTGAGGCAGCAG
Actin	AAGACCTCTATGCCAACACAG	GGAGGAGCAATGATCTTGATC
Srebf2	AGCTGGGCGATGGATGAGAG	TGACAAACTGTAGCATCTCGTCG
Sqle	ACCCACAGTTACCTGAGCACC	GGACGCCTCGTTTGTTCACTG
Idi1	GGCGCGAGCGATTGGATATG	ACCTAGAACACAGAGATTCCGGC
Scd1	GGTTTCCAAGCGCAGTTCCG	ACTGGAGATCTCTTGGAGCATGTG
Fasn	TATCCTGCGCTCCGATGAGG	GGGCAATCTGGATGGCAGTG
Control (~ -1000 bps from ChREBP-α exon 1a)	TCAAGGTTGGCGGGAAGACG	TGCAGCCTCTTACCGGGTTC
ChoRE (downstream of ChREBP-β exon 1b)	GAGGTCCCAGGATCCGAGC	GGCTCTGAGTCCTCCTCTGCG
E-box (upstream of ChREBP-β exon 1b)	AGAAGGTGATTGGCAGGCTC	GTCCTTTGCCCCTTGGTCCG
